# Supplementary material for: A chemodosimetric approach for the selective detection of Pb2+ions using a cesium based perovskite
Source: Royal Society of Chemistry journal article supplement (doi:10.1039/c6nj01783e), 2016-01-01
Supplement: c6nj01783e1.pdf [file c6nj01783e1.pdf]

## Chemodosimetric approach for selective detection of $\text{Pb}^{2+}$ ions using a Cesium based perovskite

Muhammad Aamir,<sup>a,b</sup> Muhammad Sher,<sup>b</sup> Mohammad Azad Malik,<sup>a,c</sup> Javeed Akhtar<sup>d</sup> and Neerish Revaprasadu<sup>a\*</sup>

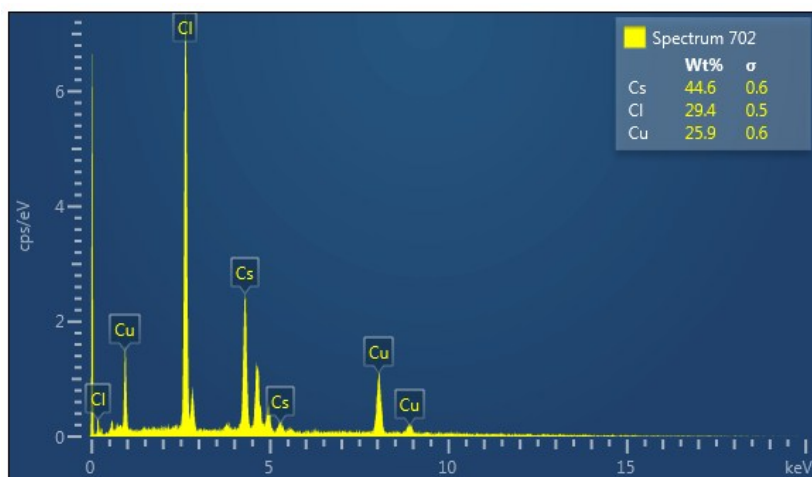

**S1.** EDX quantitative analysis of as-prepared  $\text{CsCuCl}_3$  perovskite

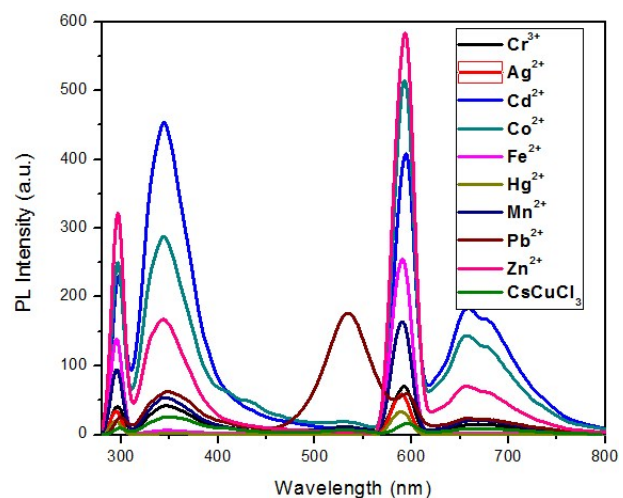

**S2.** PL emission spectrum of  $\text{CsCuCl}_3$  with addition of various metal ions.

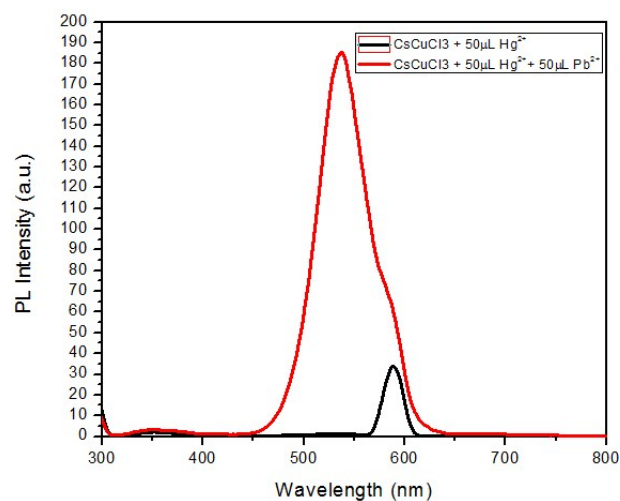

**S3.** PL spectrum of as-prepared compound CsCuCl<sub>3</sub> with addition of 50 μL solution of Hg<sup>2+</sup> followed by the addition of Pb<sup>2+</sup> solution of equal strength.

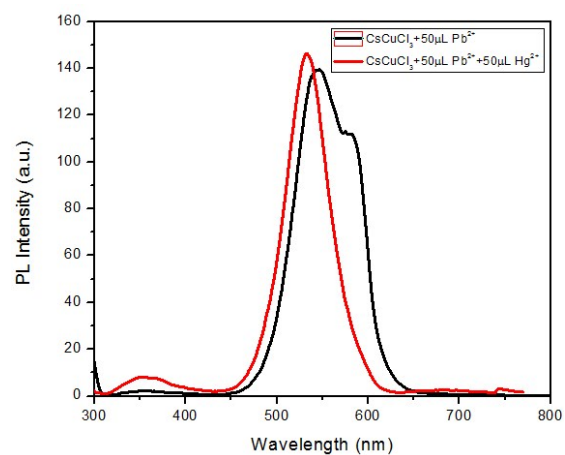

**S4.** PL spectrum of perovskite compound **CsCuCl<sub>3</sub>** with 50 μL solution of Pb<sup>2+</sup> followed by the addition of solution Hg<sup>2+</sup>.

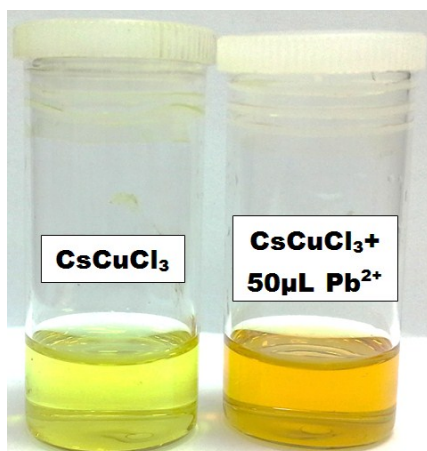

**S5 .** Change in color of as-synthesized  $\text{CsCuCl}_3$  with the addition of  $\text{Pb}^{2+}$  ions

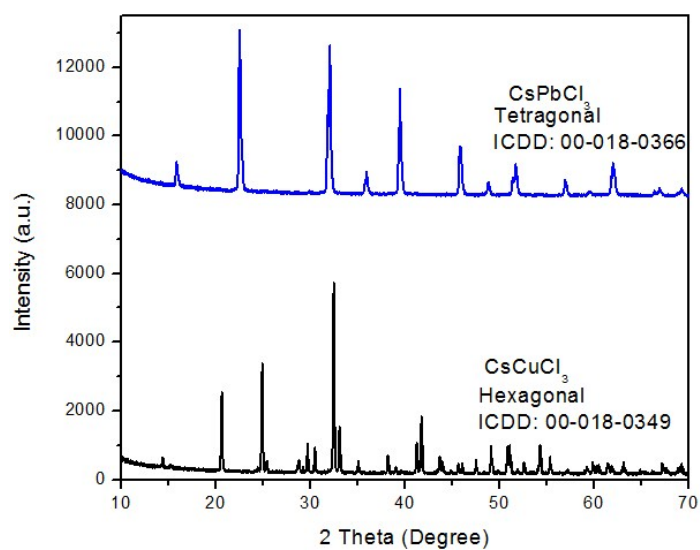

**S6.** p-XRD spectrum of  $\text{CsCuCl}_3$  and  $\text{CsPbCl}_3$  produced during the sensing process.
